# Supplementary material for: Anti-Spoilage Activity and Exopolysaccharides Production by Selected Lactic Acid Bacteria
Source: MDPI journal article supplement (doi:10.3390/foods11131914), 2022-06-27
Supplement: s1 [file s1]

## Supplementary material

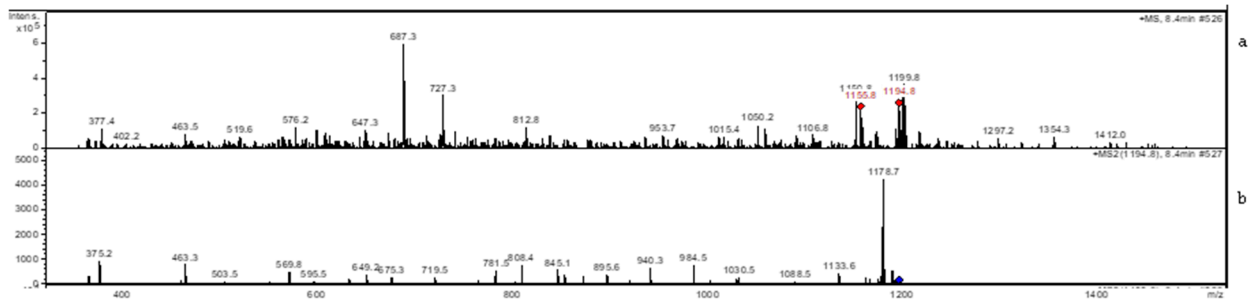

**Figure S1.** MS spectrum (a) and MS/MS spectrum (b) for the sample obtained from *Fructilactobacillus sanfranciscensis* UMCC 2990. In red are highlighted the masses of 1155.8 m/z corresponding to  $[\text{Glu}_7+\text{H}^+]^+$  and of 1194.8 m/z for  $[\text{Glu}_7+2\text{H}_2\text{O}+\text{H}^+]^+$  and in blue are the molecular ions subjected to a second fragmentation.

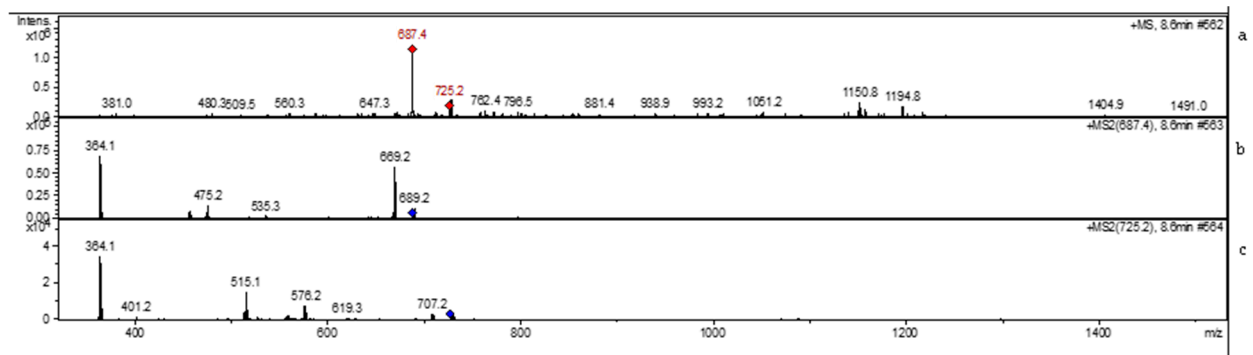

**Figure S2.** MS spectrum (a) and MS/MS spectrum (b,c) for the sample obtained from *Lentilactobacillus parabuchneri* UMCC 2992. In red are highlighted the masses of 687.4 m/z corresponding to  $[\text{Glu}_4+\text{H}_2\text{O}+\text{H}^+]^+$  and of 725.2 m/z for  $[\text{Glu}_4+2\text{H}_2\text{O}+\text{Na}^+]^+$  in blue are the molecular ions subjected to a second fragmentation.

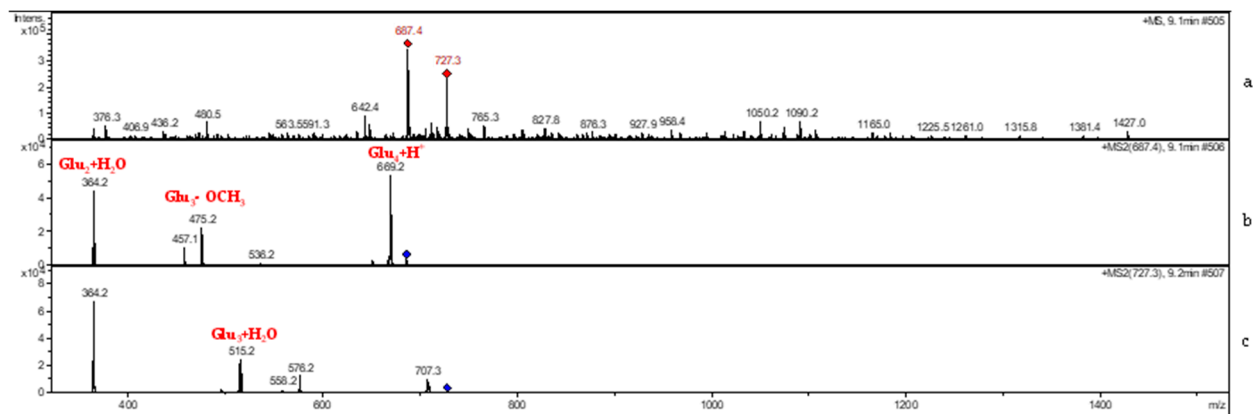

**Figure S3.** MS spectrum (a) and MS/MS spectrum (b,c) for the sample obtained from *Lentiplantibacillus plantarum* UMCC 2996. In red are highlighted the masses of 669.2 m/z corresponding to  $[\text{Glu}_4+\text{H}^+]^+$  and of 727.3 m/z for  $[\text{Glu}_4+2\text{H}_2\text{O}+\text{Na}^+]^+$  in blue are the molecular ions subjected to a second fragmentation.

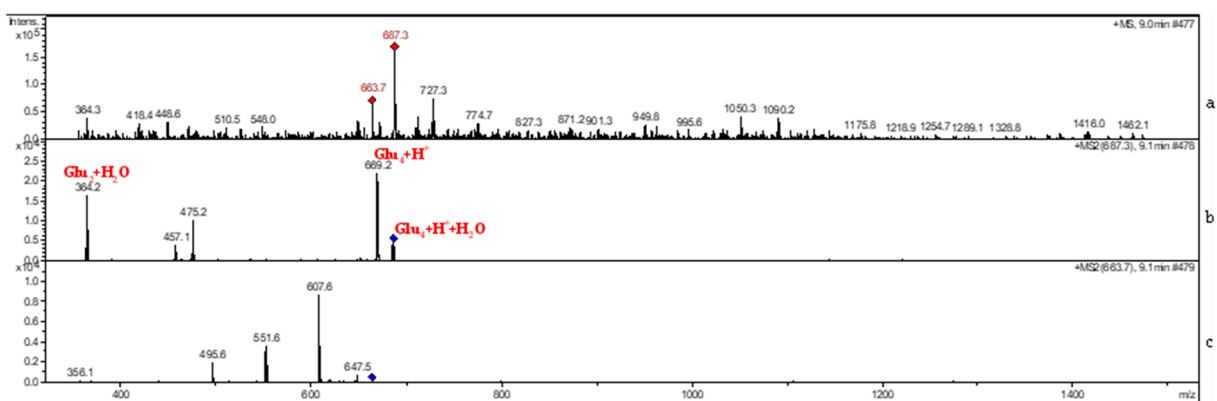

**Figure S4.** MS spectrum (a) and MS/MS spectrum (b,c) for the sample obtained from *Furfurilactobacillus rossiae* UMCC 3002. In red are highlighted the masses of 663.7 m/z corresponding to a probable contaminant and of 687.3 m/z for  $[\text{Glu}_4 + \text{H}_2\text{O} + \text{H}^+]^+$  in blue are the molecular ions subjected to a second fragmentation.

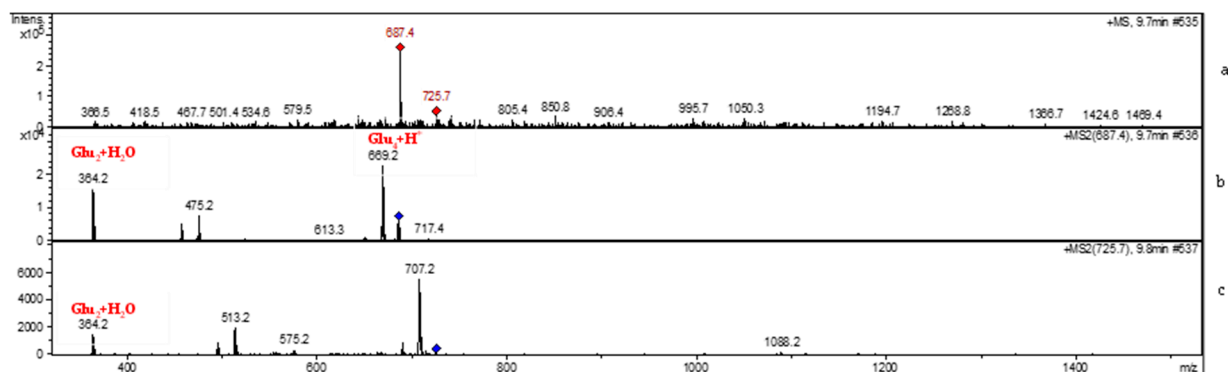

**Figure S5.** MS spectrum (a) and MS/MS spectrum (b,c) for the sample obtained from *Lactiplantibacillus plantarum* UMCC 3009. In red are highlighted the masses of 669.2 m/z corresponding to  $[\text{Glu}_4 + \text{H}^+]^+$  and of 725.7 m/z for  $[\text{Glu}_4 + 2\text{H}_2\text{O} + \text{Na}^+]^+$  in blue are the molecular ions subjected to a second fragmentation.

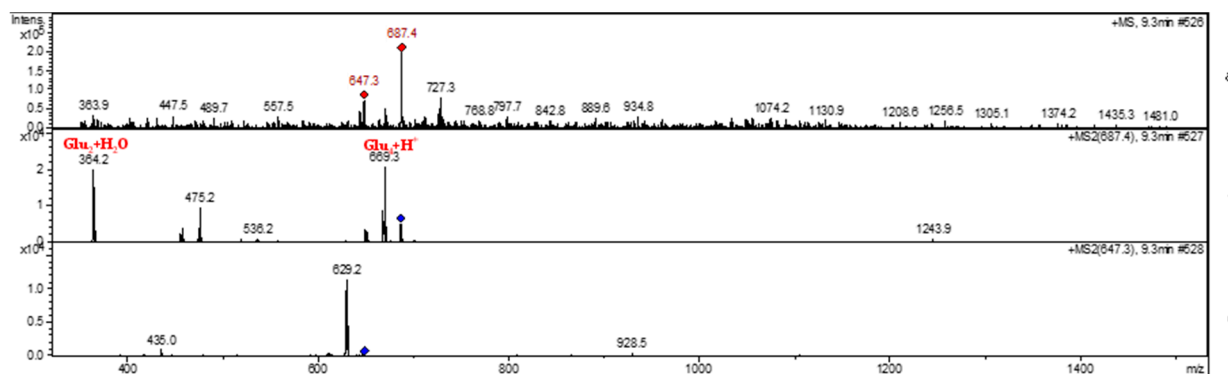

**Figure S6.** MS spectrum (a) and MS/MS spectrum (b,c) for the sample obtained from *Pediococcus pentosaceus* UMCC 3010. In red are highlighted the masses of 647.3 m/z corresponding to  $[\text{Man}_4 + \text{H}_2\text{O} + \text{Na}^+]^+$  and of 687.4 m/z for  $[\text{Glu}_4 + 2\text{H}_2\text{O} + \text{H}^+]^+$  in blue are the molecular ions subjected to a second fragmentation.

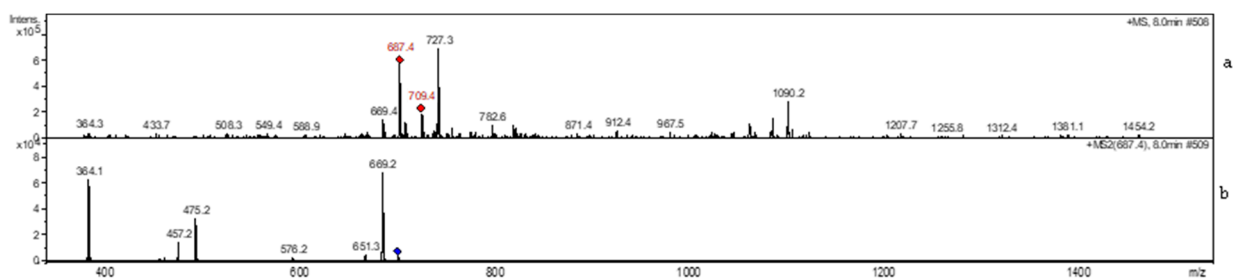

**Figure S7.** MS spectrum (a) and MS/MS spectrum (b) for the sample obtained from *Leuconostoc citreum* UMCC 3011. In red are highlighted the masses of 687.4 m/z corresponding to  $[\text{Glu}_4+\text{H}_2\text{O}+\text{H}^+]^+$  and of 709.3 m/z for  $[\text{Glu}_4+2\text{H}_2\text{O}+\text{H}^+]^+$  in blue are the molecular ions subjected to a second fragmentation.
